# Transient Effects of Anesthetics on Dendritic Spines and Filopodia in the Living Mouse Cortex

Guang Yang, Ph.D.,\* Paul C. Chang, Ph.D.,† Alex Bekker, M.D., Ph.D.,‡ Thomas J.J. Blanck, M.D., Ph.D.,§ Wen-Biao Gan, Ph.D.§

## ABSTRACT

**Background:** Anesthetics are widely used to induce unconsciousness, pain relief, and immobility during surgery. It remains unclear whether the use of anesthetics has significant and long-lasting effects on synapse development and plasticity in the brain. To address this question, the authors examined the formation and elimination of dendritic spines, postsynaptic sites of excitatory synapses, in the developing mouse cortex during and after anesthetics exposure.

**Methods:** Transgenic mice expressing yellow fluorescence protein in layer 5 pyramidal neurons were used in this study. Mice at 1 month of age underwent ketamine-xylazine and isoflurane anesthesia over a period of hours. The elimination and formation rates of dendritic spines and filopodia, the precursors of spines, were followed over hours to days in the primary somatosensory cortex using transcranial two-photon microscopy. Four to five animals were examined under each experimental condition. Student *t* test and Mann–Whitney *U* test were used to analyze the data.

**Results:** Administration of either ketamine-xylazine or isoflurane rapidly altered dendritic filopodial dynamics but had no significant effects on spine dynamics. Ketamine-xylazine

## What We Already Know about This Topic

- Animal studies suggest that exposure of the developing brain to general anesthetics can have persistent effects on neurologic function, but whether anesthetics produce long-lasting effects on synapse development is unclear

## What This Article Tells Us That Is New

- Exposure of late postnatal mice to ketamine/xylazine or isoflurane for 4 h altered dynamics of dendritic filopodia, precursors of spines, but not of dendritic spines
- Permanent changes in spine development were not observed after administration of anesthesia in juvenile mice

increased filopodial formation whereas isoflurane decreased filopodial elimination during 4 h of anesthesia. Both effects were transient and disappeared within a day after the animals woke up.

**Conclusion:** Studies suggest that exposure to anesthetics transiently affects the dynamics of dendritic filopodia but has no significant effect on dendritic spine development and plasticity in the cortex of 1-month-old mice.

\* Assistant Professor of Anesthesiology, Department of Anesthesiology, New York University Medical Center, New York, New York. † Ph.D. Student, Molecular Neurobiology Program, Skirball Institute, Department of Physiology and Neuroscience, New York University School of Medicine, New York, New York. ‡ Professor of Anesthesiology, Department of Anesthesiology, New York University Medical Center. § Associate Professor, Molecular Neurobiology Program, Skirball Institute, Department of Physiology and Neuroscience, New York University School of Medicine.

Received from the Department of Anesthesiology and Skirball Institute, New York University Medical Center, New York, New York. Submitted for publication December 30, 2010. Accepted for publication June 10, 2011. Supported by National Institutes of Health grant, Bethesda, Maryland (R01 NS047325; to Dr. Gan; 3R01GM050686-12S1; to Dr. Blanck); Alzheimer's Association, Chicago, Illinois (The Investigator-Initiated Research Grant; to Dr. Gan); and Department of Anesthesiology, New York University Medical Center. Drs. Yang and Chang contributed equally to this work.

Address correspondence to Dr. Gan: Molecular Neurobiology Program, Skirball Institute, Department of Physiology and Neuroscience, New York University School of Medicine, 540 First Avenue, New York, New York 10016. gan@saturn.med.nyu.edu. Information on purchasing reprints may be found at [www.anesthesiology.org](http://www.anesthesiology.org) or on the masthead page at the beginning of this issue. ANESTHESIOLOGY's articles are made freely accessible to all readers, for personal use only, 6 months from the cover date of the issue.

Copyright © 2011, the American Society of Anesthesiologists, Inc. Lippincott Williams & Wilkins. Anesthesiology 2011; 115:718–26

GENERAL anesthetics are essential clinical tools to produce reversible loss of consciousness, block pain sensation, and prevent movement during surgery. Although it is widely perceived that general anesthetics are safe, there is a growing concern about their long-lasting detrimental effects on brain structure and function, particularly in infant and juvenile populations.<sup>1–4</sup> Studies in developing rodents and monkeys have found that exposure to anesthetics can result in widespread apoptotic neuronal degeneration and late cognitive impairment.<sup>5–10</sup> Although it is unclear whether the results of these animal studies can be extrapolated to humans, a recent population-based cohort study in children suggests that receiving multiple anesthetics may be a significant risk factor for later development of learning disabilities.<sup>11</sup>

General anesthetics have been shown to alter neuronal activity by affecting molecular targets including *N*-methyl-D-aspartate (NMDA) receptors,  $\gamma$ -aminobutyric acid type A receptors, and  $K^+$  channels.<sup>12–14</sup> Because neuronal activity plays a critical role in synaptogenesis,<sup>15–24</sup> exposure to anesthetics may have a significant and long-lasting effect on neuronal connectivity in the developing brain and thereby contribute to learning and cognitive deficits later in life. Indeed, recent studies suggest that isoflurane exposure for 2 h signif-

icantly reduces the synapse number in mouse hippocampus at postnatal days (PNDs) 5–7.<sup>25</sup> In the mouse somatosensory cortex and hippocampus at PNDs 15 and 20, 5 h of anesthesia with midazolam, propofol, or ketamine causes a significant increase in the density of dendritic spines,<sup>26</sup> which are the postsynaptic sites of most excitatory axodendritic synapses in the brain.<sup>27,28</sup> Furthermore, a substantial increase in dendritic spine density is observed in rat medial prefrontal cortex after exposure to isoflurane, sevoflurane, or desflurane for 30–120 min at PND 16.<sup>29</sup>

Despite various effects of anesthetics on synaptogenesis in the rodent brain within the first 2–3 weeks after birth, little is known about the effect of anesthesia on synapse development in late postnatal life. In 1-month-old mice, dendritic spine remodeling in the cerebral cortex is substantially higher than that in adult mice (older than 4 months).<sup>30,31</sup> A recent study on 1-month-old mice showed no change of dendritic spine density in different brain regions after 5 h anesthesia with midazolam, propofol, or ketamine.<sup>26</sup> However, this study was performed with fixed brain preparations that only reveal the net change in spine number but do not provide information on the degree of spine formation and elimination. Thus, it remains unclear whether exposure to general anesthetics has any transient and/or long-lasting effects on dendritic spine development and plasticity in late postnatal life.

In this study, we used transcranial two-photon microscopy to examine individual dendritic spines of layer 5 pyramidal neurons in the somatosensory cortex of 1-month-old mice during and after exposure to two commonly used anesthetics: ketamine-xylazine (K-X) and isoflurane.<sup>31,32</sup> We found that a 4-h exposure to K-X or isoflurane altered the dynamics of dendritic filopodia, precursors of spines, but had no significant effects on dendritic spine dynamics. Furthermore, the effect of K-X or isoflurane on filopodia was transient and disappeared within 1 day after the animals woke up. These findings suggest that 4-h exposure to K-X or isoflurane has no long-lasting effect on dendritic spine development in the mouse cortex during late postnatal life.

## Materials and Methods

### Experimental Animals

Mice expressing yellow fluorescent protein in layer 5 pyramidal neurons (H-line)<sup>33</sup> were purchased from the Jackson Laboratory (Bar Harbor, ME) and group-housed in the Skirball animal facilities. All experiments were done in accordance with institutional guidelines (NYU Medical Center Animal Care and Use Committee, New York, NY). In all experiments, 1-month-old animals were used.

### Anesthesia Procedure

Animals were given an intraperitoneal injection (5.0 ml/kg body weight) of K-X mixture containing 17 mg/ml ketamine and 1.7 mg/ml xylazine in 0.9% sodium chloride solution. For continuous imaging with K-X, subcutaneous injections

(2.5 ml/kg body weight) of this mixture were given to animals every 1.5 h after the initial injection. For low-dose K-X administration, the initial injection was given at the concentration of 2.5 ml/kg body weight. To determine the effect of the NMDA receptor antagonist MK801, MK801 (0.25  $\mu$ g/g body weight) was injected into the peritoneum of awake mice right after the first imaging session. For isoflurane anesthesia, animals received 1.5% isoflurane through continuous oxygen flow for the induction of anesthesia and 1.0% isoflurane for the maintenance of anesthesia. During the experiment, a heating pad was used to maintain the animal's body temperature at approximately 37°C. In a different group of animals, we measured arterial blood gases under spontaneous respiration after 3–4 h anesthesia with the i-STAT system (Abbott Point of Care, Princeton, NJ). The analysis showed normal partial pressure of oxygen (K-X:  $130 \pm 4$  mmHg; isoflurane:  $149 \pm 2$  mmHg), slightly decreased pH (K-X:  $7.27 \pm 0.10$ ; isoflurane:  $7.32 \pm 0.07$ ) and moderately increased and normal partial pressure of carbon dioxide (K-X:  $58.5 \pm 23.7$  mmHg; isoflurane:  $43.8 \pm 8.5$  mmHg) under both K-X and isoflurane anesthesia, respectively, which are consistent with previous studies.<sup>34,35</sup>

### In Vivo Transcranial Two-photon Imaging

**Surgical Procedure for In Vivo Imaging.** The surgical procedure for imaging anesthetized animals has been described previously.<sup>32</sup> During surgery mice were deeply anesthetized with K-X or isoflurane (see anesthesia procedure). The skull surface was exposed with a midline scalp incision and a small skull region (approximately 200  $\mu$ m in diameter) was located over primary somatosensory cortex based on stereotaxic coordinates. A custom-made, stainless steel plate was glued (ethyl cyanoacrylate) to the skull with a central opening over the cortical region of interest. To create a cranial window for imaging, a high-speed drill was used to carefully reduce the skull thickness by approximately 50% under a dissecting microscope. The skull was immersed in the artificial cerebrospinal fluid during drilling to avoid damage of the underlying cortex due to friction-induced heat. Skull thinning was completed by carefully scraping the cranial surface with a microsurgical blade to approximately 20  $\mu$ m in thickness. The entire surgical procedure usually took less than 30 min, and the imaging took place immediately after the skull thinning. After imaging, the plate was gently detached from the skull, and the scalp was sutured with 6–0 silk.

For imaging of awake animals, the surgical procedure as previously described was performed 1 day before the imaging session, except that the steel plate was mounted on top of the skull with both cyanoacrylate glue and dental acrylic cement to ensure the tight bond between the skull and the plate. The animals were then returned to their own cages to recover and to avoid lingering effects of anesthetics before the imaging session started. After the mice woke up from the surgery, animals were habituated to the imaging setup for a few times

to minimize potential stress-related changes of spines and filopodia.

**In Vivo Imaging of Dendrites.** To reduce respiration-induced cranial movements during imaging, the steel plate on the animal's head was screwed to two metal bars that were located on both sides of the animal's head and fixed to a solid metal base. The entire animal was placed under either a Bio-Rad multiphoton microscope (Bio-Rad Laboratories, Hercules, CA) or a custom-made two-photon microscope. The Ti-sapphire laser was tuned to the optimal excitation wavelength for yellow fluorescent protein (920 nm) while using low laser power (less than 40 mW at the sample) to minimize phototoxicity. The images were acquired using a 60 $\times$  water-immersion objective at zoom of 1.0–3.0. A stack of image planes within a depth of 100  $\mu$ m from the pial surface was collected, yielding a full three-dimensional data set of dendrites in the area of interest. The step size was 2  $\mu$ m for the initial low magnification image (no zoom) for relocation at later time points and 0.75  $\mu$ m for all the other experiments (3.0 $\times$  zoom).

**Data Quantification.** Data analysis was performed as described previously.<sup>30,31,36</sup> Consistent with previous studies, we found that a sustained trend of dendritic plasticity could be acquired from four to five animals with 150–200 dendritic protrusions (spines and filopodia) quantified in each animal.<sup>18,30,31,36</sup> The formation and elimination rates of spines/filopodia were measured as the number of spines/filopodia formed or eliminated divided by the number of spines/filopodia existing in the initial image. To determine formation and elimination of dendritic protrusions over time, the same dendritic segments were identified from three-dimensional image stacks with high image quality (signal: background noise ratio more than 4) taken from both time points. The number and location of dendritic protrusions (protrusion length more than one third dendritic shaft diameter) were identified in each view. Filopodia were identified as long, thin structures without enlarged heads (generally twice as long as the average spine length, head: neck diameter ratio less than 1.2, length: neck diameter more than 3). The rest of the protrusions were classified as spines. Spines or filopodia were considered the same ("stable") between two views based on their spatial relationship to adjacent landmarks and their relative position to immediately adjacent spines. Spines or filopodia in the second view were considered different if they were more than 0.7  $\mu$ m away from their expected positions based on the first view.

### Statistics

All data were presented as mean  $\pm$  SD. SigmaPlot (Systat Software Inc, Chicago, IL) was used to conduct the statistical analysis. Tests for differences between populations were performed using two-tailed Student *t* tests with *n* being the number of animals. Significant levels were set at *P*  $\leq$  0.05. Use of Mann–Whitney U test also confirmed all the conclusions.

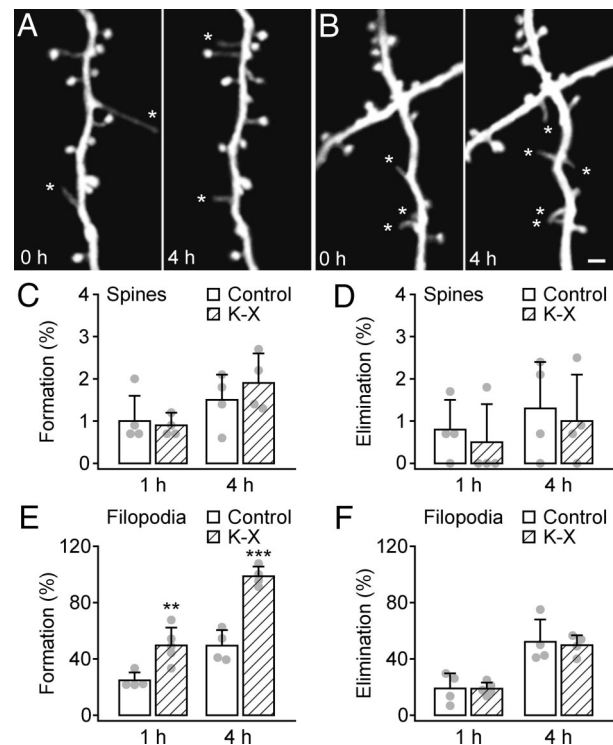

**Fig. 1.** Administration of ketamine-xylazine rapidly increased the formation of dendritic filopodia but not spines over hours. *A* and *B*, *In vivo* time-lapse imaging of the same dendritic segments over 4 h in the primary somatosensory cortex of 1-month-old animals that received no anesthesia (*A*) or ketamine-xylazine (K-X) anesthesia (*B*). Most dendritic spines on the same dendritic branches remained stable over 4 h whereas filopodia (asterisks) underwent rapid turnover. Scale bar, 2  $\mu$ m. *C* and *D*, Percentage of newly formed (*C*) and eliminated (*D*) dendritic spines over 1 and 4 h. Administration of K-X did not alter spine dynamics. *E* and *F*, Percentage of newly formed (*E*) and eliminated (*F*) dendritic filopodia over 1 and 4 h. K-X anesthesia led to a rapid increase of filopodial formation but had no effect on filopodial elimination. Percentages were calculated as the number of spines/filopodia formed or eliminated divided by the number of preexisting spines/filopodia. Each filled circle represents a single animal. Data are presented as mean  $\pm$  SD. \*\**P* < 0.01; \*\*\**P* < 0.001.

### Results

To study the effect of general anesthetics on synapse development, we measured the formation and elimination rates of dendritic spines in the primary somatosensory cortex of 1-month-old mice with or without K-X anesthesia (fig. 1*A–D*). In awake control mice that had received K-X the day before imaging but none during the imaging session, we found that the rates of newly formed and eliminated dendritic spines were  $1.0 \pm 0.6\%$  (mean  $\pm$  SD) and  $0.8 \pm 0.7\%$  over 1 h, respectively, and  $1.5 \pm 0.6\%$  and  $1.3 \pm 1.1\%$  over 4 h. K-X anesthesia for 1 h or 4 h had no significant effect on the formation and elimination of dendritic spines compared with the controls (1 h K-X:  $0.9 \pm 0.3\%$  formed, *P* > 0.6;  $0.5 \pm 0.9\%$  eliminated, *P* > 0.6; 4 h K-X:  $1.9 \pm 0.7\%$



formed,  $P > 0.4$ ;  $1.0 \pm 1.1\%$  eliminated,  $P > 0.7$ ) (fig. 1, A–D). In addition, the rate of spine formation was comparable to the rate of spine elimination over 1 or 4 h in mice with or without K-X anesthesia ( $P > 0.2$ ). Together, these results suggest that exposure to K-X for 1–4 h has no significant effect on the dynamics or density of dendritic spines.

Dendrites in the developing cortex contain not only dendritic spines but also filopodia, which are long, thin protrusions lacking a bulbous head.<sup>37</sup> Previous studies have shown that in 1-month-old mice, approximately 15% of total dendritic protrusions are filopodia in the primary visual and somatosensory cortex.<sup>17,18,30,31</sup> Furthermore, whereas spines persist over weeks to months, filopodia are highly dynamic and undergo rapid turnover within hours.<sup>30,38,39</sup> In agreement with these studies, we found that in control mice that did not receive anesthesia the formation and elimination rates of dendritic filopodia were high:  $24.7 \pm 5.7\%$  and  $19.0 \pm 10.7\%$  over 1 h,  $49.3 \pm 11.1\%$  and  $52.1 \pm 15.8\%$  over 4 h (fig. 1, E and F). Notably, the rate of filopodial formation over 1 h was significantly higher in mice with K-X anesthesia ( $49.6 \pm 12.6\%$ ) compared with mice without anesthesia ( $P < 0.01$ ; fig. 1E). K-X anesthesia for 4 h further increased the formation of filopodia ( $98.6 \pm 7.0\%$ ) compared with the no-anesthesia control group ( $P < 0.001$ ; fig. 1E). On the other hand, there was no significant difference in the rate of filopodial elimination over 1 or 4 h between K-X anesthetized and nonanesthetized animals ( $P > 0.7$ ; fig. 1F). We also found that the effect of K-X on filopodial formation was dose-dependent: a lower dose (2.5 ml/kg initial injection) of K-X resulted in a lower formation rate of filopodia over 4 h ( $77.2 \pm 18.7\%$ ,  $P < 0.05$ ). Thus, although exposure to K-X has no significant effect on spine dynamics or density, it causes a significant increase in the formation rate of dendritic filopodia.

To determine whether K-X has long-lasting effects on dendritic spines and filopodia, we imaged the same dendritic branches 8 h after the animals recovered from 4 h K-X anesthesia (fig. 2A). The animals appeared awake and reacted to visual and auditory stimuli between the 4 h and 12 h time points. We found no significant difference in spine formation ( $3.7 \pm 1.3\%$  vs.  $3.4 \pm 0.5\%$ ,  $P > 0.5$ ) and elimination ( $3.0 \pm 0.8\%$  vs.  $2.4 \pm 0.5\%$ ,  $P > 0.2$ ) over 12 h between animals with and without K-X anesthesia (fig. 2, B and C). Moreover, the formation ( $77.2 \pm 9.2\%$  vs.  $71.3 \pm 6.8\%$ ,  $P > 0.2$ ) and elimination ( $78.5 \pm 12.0\%$  vs.  $73.8 \pm 5.5\%$ ,  $P > 0.4$ ) rates of filopodia over 12 h in anesthetized mice were comparable to those of nonanesthetized control subjects (fig. 2, D and E). These results suggest that 4 h K-X anesthesia has no significant long-lasting effect on spine and filopodial dynamics.

Previous studies have suggested that filopodia serve as the precursors of spines.<sup>22,30,40–42</sup> To further investigate the effect of K-X, we identified new filopodia formed during the 4 h K-X anesthesia and examined the fate of these filopodia over the next 8 h (fig. 3A). For filopodia formed within the

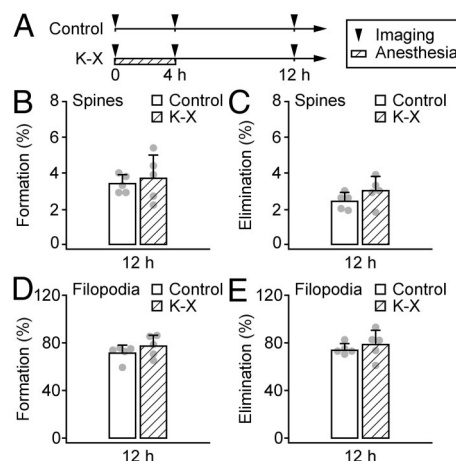

**Fig. 2.** Ketamine-xylazine has no long-lasting effects on the formation and elimination rates of dendritic spines and filopodia. **A**, Animals were under ketamine-xylazine (K-X) anesthesia for the first 4 h and recovered for the next 8 h. **B** and **C**, Percentage of newly formed (**B**) and eliminated (**C**) dendritic spines over 12 h. **D** and **E**, Percentage of newly formed (**D**) and eliminated (**E**) dendritic filopodia over 12 h. There was no significant difference in spine or filopodial formation and elimination over 12 h between animals with and without K-X anesthesia. Percentages were calculated as the number of spines/filopodia formed or eliminated divided by the number of preexisting spines/filopodia. Each filled circle represents a single animal. Data are presented as mean  $\pm$  SD.

4 h K-X anesthesia, most of them ( $73.8 \pm 4.8\%$ ) were eliminated over the next 8 h when the animals woke up. This elimination rate was comparable to that of filopodia formed without anesthesia ( $79.3 \pm 5.7\%$ ). A small fraction of filopodia persisted over the next 8 h in mice with ( $16.7 \pm 8.0\%$ ) or without ( $14.5 \pm 7.1\%$ ) K-X anesthesia. Notably,  $9.5 \pm 3.7\%$  of new filopodia formed during 4 h K-X anesthesia were transformed into spines 8 h later. This percentage of transformation from filopodia to spines was not significantly different from that of nonanesthetized animals ( $6.2 \pm 4.1\%$ ,  $P > 0.2$ ; fig. 3A). Because more filopodia were formed during the 4 h K-X anesthesia, there were approximately 0.9% (fraction of total spines) more new spines transformed from filopodia in K-X anesthetized animals at the 12-h time point compared with no K-X control mice. Thus, new filopodia formed during the 4 h K-X anesthesia are largely eliminated and result in only a slight increase (less than 1%) in new spines 8 h later.

It is important to note that new spines transformed from filopodia are largely unstable. In fact, more than half of the new spines that were transformed from filopodia within 4 h were eliminated in the next 8 h, regardless of whether they were formed while the mice were awake or anesthetized (fig. 3B). Furthermore, when the fate of new spines formed over hours to days was followed over a period of 1 month, only  $4.8 \pm 8.2\%$  of spines formed within 12 h and  $7.0 \pm 7.0\%$  of spines formed within 2 days persisted 1 month later (fig. 3C). These results are consistent with previous findings showing

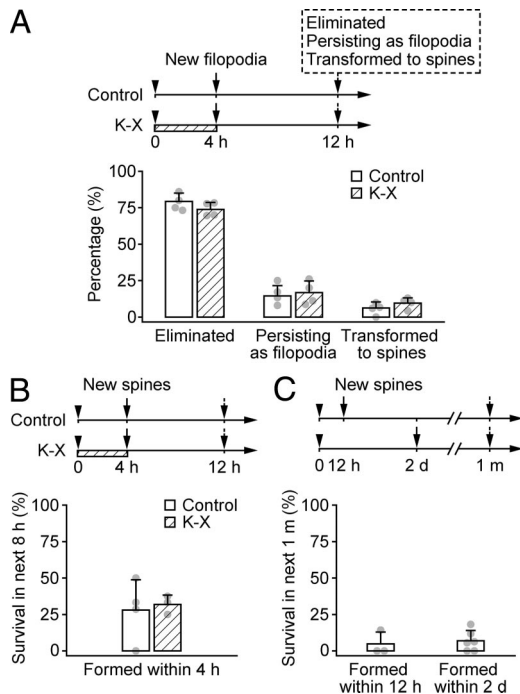

**Fig. 3.** Most newly formed filopodia and spines do not persist. **A**, The percentage of new filopodia formed over the first 4 h that were eliminated, that persisted as filopodia, or that were transformed to spines over the next 8 h. Most filopodia were eliminated, a small percentage persisted, and fewer than 10% of filopodia were transformed to spines. There was no significant difference between filopodia formed with and without ketamine-xylazine (K-X). **B**, Percentage of new spines persisting for 8 h. Fewer than half of the new spines formed within the first 4 h persisted for the next 8 h. There was no significant difference between spines formed with and without K-X. **C**, Percentage of new spines persisting for 1 month. Fewer than 7% of new spines formed within 12 h or 2 days persisted over 1 month. Each filled circle represents a single animal. Data are presented as mean  $\pm$  SD.

that most new spines are eliminated over subsequent weeks to months.<sup>18</sup> Taken together, these findings suggest that 4 h K-X anesthesia has little or no effect on the formation of new dendritic spines over long periods of time.

Previous studies have shown that ketamine is an antagonist of NMDA receptors and produces unconsciousness with analgesia.<sup>43</sup> Xylazine is an agonist of  $\alpha 2$ -adrenergic receptors and serves as an adjunct to ketamine anesthesia with sedative and muscle relaxant activities.<sup>44</sup> To test whether the increased rate of filopodial formation during K-X anesthesia could be due to NMDA receptor blockade, we administered an intraperitoneal injection of MK801 (0.25  $\mu$ g/g), another NMDA receptor antagonist, in awake animals. We observed that MK801 injection caused a high rate of filopodial formation ( $115.5 \pm 7.5\%$  vs.  $49.3 \pm 11.1\%$ ; fig. 4A) comparable to that in animals anesthetized with K-X for 4 h (fig. 1E). Over 12 h, the formation rate of filopodia was comparable between MK801 and saline-injected control animals ( $76.4 \pm 9.5\%$  vs.  $71.3 \pm 6.8\%$ ,  $P > 0.4$ ; fig. 4A), suggesting the

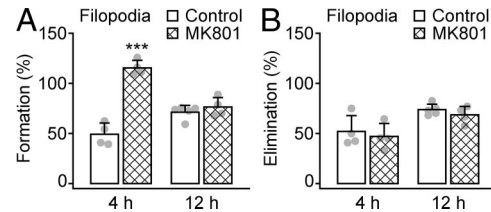

**Fig. 4.** Systemic administration of MK801 mimics ketamine-xylazine induced filopodial formation. **A**, Percentage of newly formed dendritic filopodia over 4 and 12 h. Animals were injected with MK801 after the first imaging session and re-imaged 4 and 12 h later. MK801 injection caused a rapid increase of filopodial formation over 4 but not 12 h. **B**, Percentage of eliminated dendritic filopodia over 4 and 12 h. MK801 had no significant effects on filopodial elimination. Percentages were calculated as the number of filopodia formed or eliminated divided by the number of preexisting filopodia. Each filled circle represents a single animal. Data are presented as mean  $\pm$  SD. \*\*\* $P < 0.001$ .

effect of MK801 on filopodial formation is transient. The elimination rates of filopodia over 4 h ( $47.1 \pm 12.9\%$  vs.  $52.1 \pm 15.8\%$ ,  $P > 0.6$ ) and 12 h ( $68.6 \pm 8.5\%$  vs.  $73.8 \pm 5.5\%$ ,  $P > 0.3$ ) were unaffected by MK801 administration (fig. 4B). Together, these results suggest that the transient effect of 4 h K-X anesthesia on filopodial dynamics is likely mediated by NMDA receptor blockade.

To further investigate the effect of anesthetics on synapse development, we examined the dynamics of dendritic spines and filopodia after the animals were exposed to isoflurane anesthesia (fig. 5). Similar to K-X, we found that isoflurane had no significant effect on the formation ( $0.9 \pm 0.4\%$  vs.  $1.5 \pm 0.6\%$ ,  $P > 0.2$ ) and elimination ( $0.8 \pm 0.8\%$  vs.  $1.3 \pm 1.1\%$ ,  $P > 0.5$ ) of dendritic spines over 4 h (fig. 5, A–C). Interestingly, the rate of filopodia elimination was significantly lower in isoflurane-anesthetized mice than in non-anesthetized control mice ( $18.7 \pm 3.4\%$  vs.  $52.1 \pm 15.8\%$ ,  $P < 0.05$ ; fig. 5E). The rate of filopodial formation over 4 h in isoflurane-anesthetized mice was also lower than that in control mice, although not statistically significant ( $32.2 \pm 10.1\%$  vs.  $49.3 \pm 11.1\%$ ,  $P = 0.1$ ; fig. 5D). After the animals woke up for 8 h, there was no difference in filopodial elimination between animals with and without isoflurane ( $70.8 \pm 4.5\%$  vs.  $73.8 \pm 5.5\%$ ,  $P > 0.4$ ), suggesting that similar to K-X, isoflurane also has a transient effect on filopodial dynamics.

## Discussion

There is increasing evidence that anesthetics induce changes in the developing brain.<sup>3,4</sup> However, the extent of such changes either as a function of the anesthetic, the developmental age of an animal, or the length of the exposure has not been well established. Delineation of these relationships is essential to the development of clinically relevant strategies that would minimize the effect of anesthetic exposure in neonates and during early childhood.

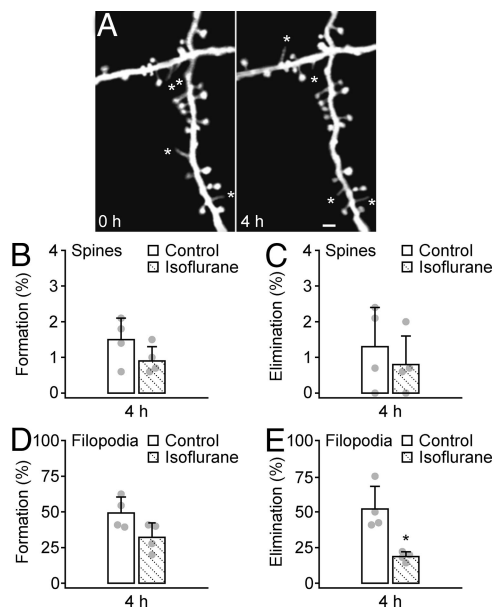

**Fig. 5.** Administration of isoflurane affects the dynamics of dendritic filopodia but not spines. *A*, *In vivo* time-lapse imaging of the same dendritic segments over 4 h in 1-month-old, isoflurane-anesthetized animals. Most dendritic spines remained stable over 4 h whereas filopodia (asterisks) underwent rapid turnover. Scale bar, 2  $\mu$ m. *B* and *C*, Percentage of newly formed (*B*) and eliminated (*C*) dendritic spines over 4 h. Administration of isoflurane did not alter spine formation and elimination during this time period. *D* and *E*, Percentage of newly formed (*D*) and eliminated (*E*) dendritic filopodia over 4 h. Isoflurane anesthesia decreased the elimination of filopodia but had no significant effect on the formation of filopodia over 4 h. Percentages were calculated as the number of spines/filopodia formed or eliminated divided by the number of preexisting spines/filopodia. Each filled circle represents a single animal. Data are presented as mean  $\pm$  SD. \* $P < 0.05$ .

In the current study, we used *in vivo* two-photon microscopy to examine whether exposure to general anesthetics has long-lasting effects on the development and plasticity of dendritic spines in the primary somatosensory cortex of mice at 1 month of age. This intravital imaging approach allows monitoring of the same dendritic spines over extended periods of time in the living mouse cortex, and therefore provides a powerful tool to determine the extent of anesthetic-induced structural changes in neural circuits. By comparing dendritic spine plasticity in mice with or without anesthesia, we have found that exposure to K-X and isoflurane for 4 h has no significant effect on dendritic spine formation and elimination but transiently alters the dynamics of dendritic filopodia, the precursors of dendritic spines. The effect of both anesthetics on filopodial dynamics is transient such that the formation and elimination rates of filopodia return to the control level 8 h after animals recover from anesthesia. Furthermore, there is no significant difference in spine formation and elimination over 12 h between mice with and without 4 h anesthesia. Together, our results suggest that exposure to general anesthetics for 4 h has no significant

long-lasting effect on synaptic connectivity in the mouse cortex during late postnatal development.

Our studies show that, during late postnatal development (1 month of age), K-X anesthesia leads to a transient increase of dendritic filopodia over 4 h and a slight increase (less than 1%) of new spines over the next 8 h. It might be argued that this small increase in new spines could have important functional consequences on the development of neural circuits. However, recent *in vivo* two-photon imaging studies have shown that in 1-month-old mice, approximately 6–7% of spines were eliminated and formed over a 2-day interval in barrel and primary motor cortices under normal conditions.<sup>18</sup> Sensory enrichment and motor skill learning led to an additional 5–7% increase in new spine formation over 1–2 days in barrel and motor cortex, respectively.<sup>18</sup> Thus, the population of new spines associated with K-X exposure is much smaller than the population of new spines formed over 1–2 days under normal and enriched environments, suggesting that 4 h exposure to K-X has less effect on the development of neuronal connections than daily sensory or motor experience. Furthermore, consistent with previous studies,<sup>18</sup> most new spines formed over days were eliminated over subsequent weeks and months (fig. 3). Taken together, our results suggest that long-lasting effects of anesthesia on synaptic connections are negligible in 1-month-old mice.

Recent studies from fixed brain preparations have shown that exposure to ketamine<sup>45</sup> and isoflurane<sup>25</sup> decreases synapse or spine density in hippocampus of neonatal rodents at PNDs 5–13. Five-hour exposure to ketamine<sup>26</sup> caused a significant increase in dendritic spine density in the somatosensory cortex of PNDs 15 and 20 but not PND 30 mice, and 2-h exposure to isoflurane<sup>29</sup> increased the spine density in the prefrontal cortex of PND 16 rats. These findings suggest that general anesthesia has a significant effect on the number of dendritic spines during early but not late postnatal development. However, because these studies were based on single time-point observations, it is not known whether K-X or isoflurane may have a significant effect on the rate of dendritic spine formation and elimination without affecting the net number of spines in late postnatal life. Using transcranial two-photon imaging to follow spine dynamics in the living mouse cortex, we found that K-X and isoflurane have only transient effects on dendritic filopodial dynamics without significant long-lasting effect on the dynamics and density of spines in the primary somatosensory cortex of 1-month-old mice. It is important to note that previous studies did not follow the fate of dendritic spines and filopodia associated with anesthesia in animals 2–3 weeks old.<sup>26,29</sup> Therefore, it remains to be determined whether exposure to anesthetics in early postnatal development also has a transient, but not long-lasting, effect on the plasticity of dendritic filopodia and spines.

The mechanisms underlying K-X and isoflurane effects on dendritic filopodia remain unclear. Anesthetics alter neural activity and metabolism<sup>46</sup> and have variable effects on



blood pressure and cardiac output.<sup>34,35,47–49</sup> It has been shown in both rats<sup>47</sup> and mice<sup>35</sup> that K-X decreases arterial pH, increases partial arterial pressure of carbon dioxide, and decreases partial arterial pressure of oxygen. It is possible that the changes of neuronal activity and various physiologic parameters all contribute to the alteration of dendritic filopodial dynamics in the brain. A wide variety of experimental evidence has shown that neuronal activity/experience plays a vital role in regulating synaptogenesis in developing neural circuits.<sup>16,17,20,21,23</sup> It has been shown that ketamine inhibits glutamatergic signaling *via* blockade of NMDA receptors. Isoflurane also affects glutamatergic transmission by blocking release of glutamate,<sup>50,51</sup> in addition to enhancing  $\gamma$ -aminobutyric acid and glycine receptor transmission.<sup>13,14</sup> Thus, K-X and isoflurane likely modulate neuronal activity through different mechanisms, and this differential modulation of neuronal activity may affect dendritic filopodial dynamics differently. Consistent with this notion, our studies showed that over a 4-h anesthesia interval, K-X preferentially increased the rate of filopodial formation whereas isoflurane mainly decreased the rate of filopodial elimination. MK801, an antagonist of NMDA receptors, produced a similar effect on filopodial dynamics as K-X, suggesting that the effect of K-X is due, at least in part, to blockade of NMDA receptor activity.

To our knowledge, our studies are the first to evaluate the effect of general anesthetics on the dynamics of synaptic structures in living animals using transcranial two-photon microscopy. Despite the advantage of being able to repetitively image the neuronal structures in the intact cortex of live animals, it is important to mention some potential limitations of using *in vivo* two-photon microscopy to study the effect of anesthetics on synapse development and plasticity and the strategies to overcome such limitations. First, previous surgery and related anesthesia is unavoidable during the animal preparation, and the awake, head-restraining situation may induce extra stress and cause changes in spine dynamics. It is important to minimize the potential effect of previous anesthesia by performing imaging on awake animals at least 1 day after anesthesia exposure and surgical preparation. It is also desirable to habituate animals to the imaging setup a few times on the day before imaging to minimize stress. Second, surgery may induce an inflammatory response and contribute to the alteration of spine and filopodial dynamics. Although skull thinning is a minor and noninvasive surgery, extra care must be taken such that the skull is not overthinned for imaging. Our previous study has demonstrated that carefully performed skull thinning does not induce the activation of microglia, the innate immune cells in the brain.<sup>36</sup> Finally, it is important to point out that our study focused on the formation and elimination of dendritic spines of layer 5 pyramidal cells in the superficial layer of mouse somatosensory cortex. Future studies of the effect of general anesthetics on other cell types and brain regions will be needed in order to obtain a more comprehensive under-

standing of the effects of anesthetics on brain structure and function.

Our findings show that exposure to general anesthetics such as K-X and isoflurane has transient effects on filopodial (spine precursors) dynamics but does not affect dendritic spine plasticity in 1-month-old mice. Because these effects rapidly disappeared upon recovery, 4-h exposure to K-X or isoflurane does not appear to have a long-lasting detrimental effect on synaptic connections in adolescent rodents. The relevance of these findings to clinical anesthesia in infant and juvenile patients remains unclear, largely due to the substantial differences in neurodevelopmental time courses between rodents and humans. Although it is difficult to extrapolate the developmental stage of mouse brains to that of human brains, the timeline of synaptogenesis may offer a hint. In the cerebral cortex of mammals, including that of rodents and humans, rapid synaptogenesis during early postnatal life is followed by an up to 50% loss of synapses that extends through late postnatal development.<sup>52–56</sup> In mouse somatosensory cortex, for example, the synapse density peaks at approximately 2 weeks of age and decreases to adult level at approximately 2 months of age.<sup>18,30</sup> In human visual cortex, the rapid synapse production ends at a postnatal age of approximately 8 months and the subsequent synapse elimination extends at approximately 3 years of age.<sup>56</sup> Assuming K-X and isoflurane have similar effects on synapse plasticity during the period of synapse pruning in both rodents and humans, our results would suggest that exposure to anesthetics for hours is likely safe for pediatric patients after the toddler stage.

The authors thank Yong-sheng Li, M.D. (Assistant Professor, Department of Neurology, New York University Medical Center, New York, New York), and Michael Haile, M.D. (Assistant Professor, Department of Anesthesiology, New York University Medical Center), for their help on the blood gas measurement, and Conor Liston, M.D., Ph.D. (DeWitt Wallace Research Fellow, Department of Psychiatry, Weill Cornell Medical College, New York, New York), for his critical comments on the manuscript.

## References

1. Kalkman CJ, Peelen L, Moons KG, Veenhuizen M, Bruens M, Sinnema G, de Jong TP: Behavior and development in children and age at the time of first anesthetic exposure. *ANESTHESIOLOGY* 2009; 110:805–12
2. Anand KJ, Soriano SG: Anesthetic agents and the immature brain: Are these toxic or therapeutic? *ANESTHESIOLOGY* 2004; 101:527–30
3. Perouansky M, Hemmings HC, Jr.: Neurotoxicity of general anesthetics: Cause for concern? *ANESTHESIOLOGY* 2009; 111: 1365–71
4. Creeley CE, Olney JW: The young: Neuroapoptosis induced by anesthetics and what to do about it. *Anesth Analg* 2010; 110:442–8
5. Ikonomidou C, Bosch F, Miksa M, Bittigau P, Vöckler J, Dikranian K, Tenkova TI, Stefovskaya V, Turski L, Olney JW: Blockade of NMDA receptors and apoptotic neurodegeneration in the developing brain. *Science* 1999; 283:70–4
6. Satomoto M, Satoh Y, Terui K, Miyao H, Takishima K, Ito M, Imaki J: Neonatal exposure to sevoflurane induces abnormal

- social behaviors and deficits in fear conditioning in mice. *ANESTHESIOLOGY* 2009; 110:628–37
7. Jevtovic-Todorovic V, Hartman RE, Izumi Y, Benshoff ND, Dikranian K, Zorumski CF, Olney JW, Wozniak DF: Early exposure to common anesthetic agents causes widespread neurodegeneration in the developing rat brain and persistent learning deficits. *J Neurosci* 2003; 23:876–82
  8. Yon JH, Daniel-Johnson J, Carter LB, Jevtovic-Todorovic V: Anesthesia induces neuronal cell death in the developing rat brain *via* the intrinsic and extrinsic apoptotic pathways. *Neuroscience* 2005; 135:815–27
  9. Yoshizawa K, Oishi Y, Matsumoto M, Nyska A: Ischemic brain damage after ketamine and xylazine treatment in a young laboratory monkey (*Macaca fascicularis*). *Contemp Top Lab Anim Sci* 2005; 44:19–24
  10. Stratmann G, Sall JW, May LD, Bell JS, Magnusson KR, Rau V, Visrodia KH, Alvi RS, Ku B, Lee MT, Dai R: Isoflurane differentially affects neurogenesis and long-term neurocognitive function in 60-day-old and 7-day-old rats. *ANESTHESIOLOGY* 2009; 110:834–48
  11. Wilder RT, Flick RP, Sprung J, Katusic SK, Barbaresi WJ, Mickelson C, Gleich SJ, Schroeder DR, Weaver AL, Warner DO: Early exposure to anesthesia and learning disabilities in a population-based birth cohort. *ANESTHESIOLOGY* 2009; 110:796–804
  12. Franks NP, Lieb WR: Molecular and cellular mechanisms of general anesthesia. *Nature* 1994; 367:607–14
  13. Rudolph U, Antkowiak B: Molecular and neuronal substrates for general anaesthetics. *Nat Rev Neurosci* 2004; 5:709–20
  14. Yamakura T, Bertaccini E, Trudell JR, Harris RA: Anesthetics and ion channels: Molecular models and sites of action. *Annu Rev Pharmacol Toxicol* 2001; 41:23–51
  15. Gan WB, Lichtman JW: Synaptic segregation at the developing neuromuscular junction. *Science* 1998; 282:1508–11
  16. Gordon JA, Stryker MP: Experience-dependent plasticity of binocular responses in the primary visual cortex of the mouse. *J Neurosci* 1996; 16:3274–86
  17. Zuo Y, Yang G, Kwon E, Gan WB: Long-term sensory deprivation prevents dendritic spine loss in primary somatosensory cortex. *Nature* 2005; 436:261–5
  18. Yang G, Pan F, Gan WB: Stably maintained dendritic spines are associated with lifelong memories. *Nature* 2009; 462:920–4
  19. Kakizawa S, Yamasaki M, Watanabe M, Kano M: Critical period for activity-dependent synapse elimination in developing cerebellum. *J Neurosci* 2000; 20:4954–61
  20. Engert F, Bonhoeffer T: Dendritic spine changes associated with hippocampal long-term synaptic plasticity. *Nature* 1999; 399:66–70
  21. Yuste R, Bonhoeffer T: Morphological changes in dendritic spines associated with long-term synaptic plasticity. *Annu Rev Neurosci* 2001; 24:1071–89
  22. Bhatt DH, Zhang S, Gan WB: Dendritic spine dynamics. *Annu Rev Physiol* 2009; 71:261–82
  23. Buonomano DV, Merzenich MM: Cortical plasticity: From synapses to maps. *Annu Rev Neurosci* 1998; 21:149–86
  24. Katz LC, Shatz CJ: Synaptic activity and the construction of cortical circuits. *Science* 1996; 274:1133–8
  25. Head BP, Patel HH, Niesman IR, Drummond JC, Roth DM, Patel PM: Inhibition of p75 neurotrophin receptor attenuates isoflurane-mediated neuronal apoptosis in the neonatal central nervous system. *ANESTHESIOLOGY* 2009; 110:813–25
  26. De Roo M, Klausner P, Briner A, Nikonenko I, Mendez P, Dayer A, Kiss JZ, Muller D, Vutsits L: Anesthetics rapidly promote synaptogenesis during a critical period of brain development. *PLoS One* 2009; 4:e7043
  27. Shepherd GM: The dendritic spine: A multifunctional integrative unit. *J Neurophysiol* 1996; 75:2197–210
  28. Yuste R, Bonhoeffer T: Genesis of dendritic spines: Insights from ultrastructural and imaging studies. *Nat Rev Neurosci* 2004; 5:24–34
  29. Briner A, De Roo M, Dayer A, Muller D, Habre W, Vutsits L: Volatile anesthetics rapidly increase dendritic spine density in the rat medial prefrontal cortex during synaptogenesis. *ANESTHESIOLOGY* 2010; 112:546–56
  30. Zuo Y, Lin A, Chang P, Gan WB: Development of long-term dendritic spine stability in diverse regions of cerebral cortex. *Neuron* 2005; 46:181–9
  31. Grutzendler J, Kasthuri N, Gan WB: Long-term dendritic spine stability in the adult cortex. *Nature* 2002; 420:812–6
  32. Yang G, Pan F, Parkhurst CN, Grutzendler J, Gan WB: Thinned-skull cranial window technique for long-term imaging of the cortex in live mice. *Nat Protoc* 2010; 5:201–8
  33. Feng G, Mellor RH, Bernstein M, Keller-Peck C, Nguyen QT, Wallace M, Nerbonne JM, Lichtman JW, Sanes JR: Imaging neuronal subsets in transgenic mice expressing multiple spectral variants of GFP. *Neuron* 2000; 28:41–51
  34. Janssen BJ, De Celle T, Debets JJ, Brouns AE, Callahan MF, Smith TL: Effects of anesthetics on systemic hemodynamics in mice. *Am J Physiol Heart Circ Physiol* 2004; 287:H1618–24
  35. Erhardt W, Hebestedt A, Aschenbrenner G, Pichotka B, Blumel G: A comparative study with various anesthetics in mice (pentobarbitone, ketamine-xylazine, carfentanyl-etomidate). *Res Exp Med (Berl)* 1984; 184:159–69
  36. Xu HT, Pan F, Yang G, Gan WB: Choice of cranial window type for *in vivo* imaging affects dendritic spine turnover in the cortex. *Nat Neurosci* 2007; 10:549–51
  37. Harris KM, Kater SB: Dendritic spines: Cellular specializations imparting both stability and flexibility to synaptic function. *Annu Rev Neurosci* 1994; 17:341–71
  38. Portera-Cailliau C, Pan DT, Yuste R: Activity-regulated dynamic behavior of early dendritic protrusions: Evidence for different types of dendritic filopodia. *J Neurosci* 2003; 23:7129–42
  39. Jontes JD, Smith SJ: Filopodia, spines, and the generation of synaptic diversity. *Neuron* 2000; 27:11–4
  40. Dailey ME, Smith SJ: The dynamics of dendritic structure in developing hippocampal slices. *J Neurosci* 1996; 16:2983–94
  41. Ziv NE, Smith SJ: Evidence for a role of dendritic filopodia in synaptogenesis and spine formation. *Neuron* 1996; 17:91–102
  42. Fiala JC, Feinberg M, Popov V, Harris KM: Synaptogenesis *via* dendritic filopodia in developing hippocampal area CA1. *J Neurosci* 1998; 18:8900–11
  43. Thomson AM, West DC, Lodge D: An N-methylaspartate receptor-mediated synapse in rat cerebral cortex: A site of action of ketamine? *Nature* 1985; 313:479–81
  44. Wright M: Pharmacologic effects of ketamine and its use in veterinary medicine. *J Am Vet Med Assoc* 1982; 180:1462–71
  45. Tan H, Ren RR, Xiong ZQ, Wang YW: Effects of ketamine and midazolam on morphology of dendritic spines in hippocampal CA1 region of neonatal mice. *Chin Med J (Engl)* 2009; 122:455–9
  46. Franks NP: General anaesthesia: From molecular targets to neuronal pathways of sleep and arousal. *Nat Rev Neurosci* 2008; 9:370–86
  47. Wixson SK, White WJ, Hughes HC, Jr., Lang CM, Marshall WK: The effects of pentobarbital, fentanyl-droperidol, ketamine-xylazine and ketamine-diazepam on arterial blood pH, blood gases, mean arterial blood pressure and heart rate in adult male rats. *Lab Anim Sci* 1987; 37:736–42
  48. Yang XP, Liu YH, Rhaleb NE, Kurihara N, Kim HE, Carretero OA: Echocardiographic assessment of cardiac function in conscious and anesthetized mice. *Am J Physiol* 1999; 277:H1967–74
  49. Menke H, Vaupel P: Effect of injectable or inhalational anes-



- thetics and of neuroleptic, neuroleptanalgesic, and sedative agents on tumor blood flow. *Radiat Res* 1988; 114:64-76
50. MacIver MB, Mikulec AA, Amagasu SM, Monroe FA: Volatile anesthetics depress glutamate transmission *via* presynaptic actions. *ANESTHESIOLOGY* 1996; 85:823-34
  51. Schlame M, Hemmings HC, Jr.: Inhibition by volatile anesthetics of endogenous glutamate release from synaptosomes by a presynaptic mechanism. *ANESTHESIOLOGY* 1995; 82:1406-16
  52. Lübke J, Albus K: The postnatal development of layer VI pyramidal neurons in the cat's striate cortex, as visualized by intracellular Lucifer yellow injections in aldehyde-fixed tissue. *Brain Res Dev Brain Res* 1989; 45:29-38
  53. Markus EJ, Petit TL: Neocortical synaptogenesis, aging, and behavior: Lifespan development in the motor-sensory system of the rat. *Exp Neurol* 1987; 96:262-78
  54. Rakic P, Bourgeois JP, Eckenhooff MF, Zecevic N, Goldman-Rakic PS: Concurrent overproduction of synapses in diverse regions of the primate cerebral cortex. *Science* 1986; 232:232-5
  55. Huttenlocher PR, Dabholkar AS: Regional differences in synaptogenesis in human cerebral cortex. *J Comp Neurol* 1997; 387:167-78
  56. Huttenlocher PR, de Courten C, Garey LJ, Van der Loos H: Synaptogenesis in human visual cortex-evidence for synapse elimination during normal development. *Neurosci Lett* 1982; 33:247-52

## ANESTHESIOLOGY REFLECTIONS

### A "Cocaine Paperweight" from C.F. Boehringer & Soehne

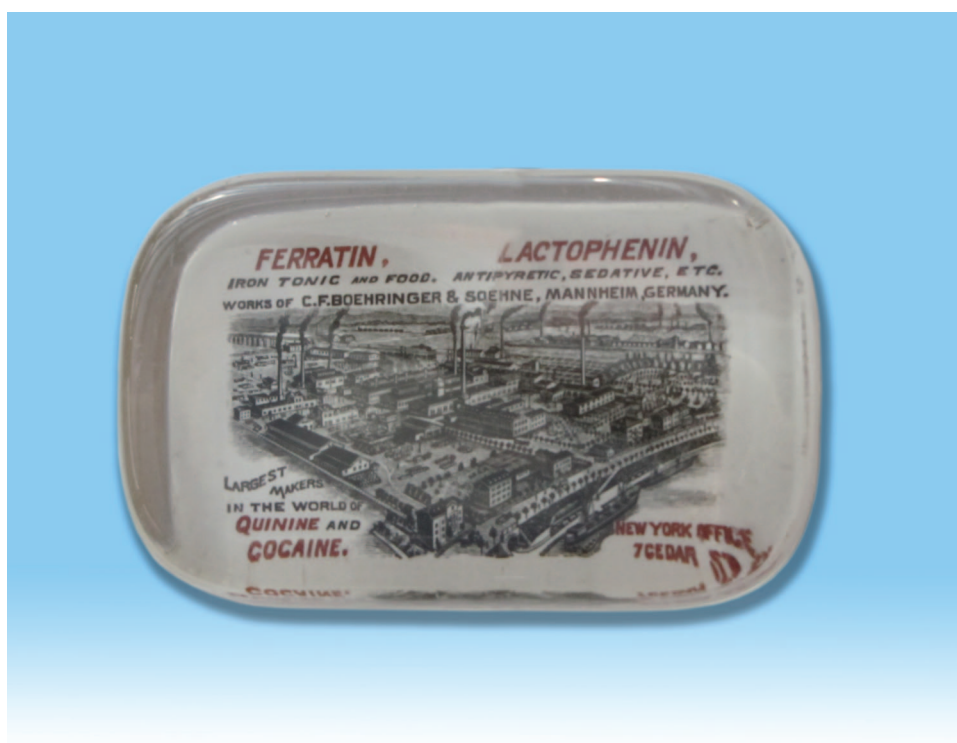

In 1859 Christian Friedrich Boehringer (1791-1867) renamed his pharmaceutical firm in Mannheim, Germany, as "C.F. Boehringer & Soehne" (B&S). As advertised on this paperweight (*above*), B&S styled itself as the "largest makers in the world of Quinine and Cocaine." The company also prided itself on distributing "beautiful, well-defined crystals." From at least 1896 to 1906, B&S boasted that the "merits of our Cocaine, as a first-class, thoroughly reliable preparation, have been distinguished by the approbation of Dr. Carl Koller, of New York [and] formerly of Vienna, the first to apply Cocaine to Medicine." Located less than 8 miles from the New York branch of B&S, ophthalmologist Koller's office likely received its share of B&S paperweights like the one above. (Copyright © the American Society of Anesthesiologists, Inc. This image also appears in the *Anesthesiology Reflections* online collection available at [www.anesthesiology.org](http://www.anesthesiology.org).)

George S. Bause, M.D., M.P.H., Honorary Curator, ASA's Wood Library-Museum of Anesthesiology, Park Ridge, Illinois, and Clinical Associate Professor, Case Western Reserve University, Cleveland, Ohio. [UJYC@aol.com](mailto:UJYC@aol.com).
